# Supplementary material for: Differences in pregnancy outcomes and obstetric care between asylum seeking and resident women: a cross-sectional study in a German federal state, 2010–2016
Source: Springer Nature journal article supplement (doi:10.1186/s12884-018-2053-1), 2018-10-24
Supplement: MOESM1 [file 16222712]

**Additional file 1: Absolute frequency and prevalence (per 100,000) of pregnancy outcomes and caesarean sections by age group and residence status, N=19,864 women**

|                                               | Age group | Resident women |                        | Asylum seekerum seeking women |                        | Total  |                        |
|-----------------------------------------------|-----------|----------------|------------------------|-------------------------------|------------------------|--------|------------------------|
|                                               |           | n              | %                      | n                             | %                      | N      | %                      |
|                                               | 12-20     | 602            | 3.1                    | 88                            | 15.5                   | 690    | 3.5                    |
|                                               | 21-30     | 7,417          | 38.4                   | 314                           | 55.2                   | 7,731  | 38.9                   |
|                                               | 31-40     | 10,460         | 54.2                   | 154                           | 27.1                   | 10,614 | 53.4                   |
|                                               | 41-50     | 816            | 4.2                    | 13                            | 2.3                    | 829    | 4.2                    |
|                                               | all       | 19,295         | 100.0                  | 569                           | 100.0                  | 19,864 | 100.0                  |
| <b>Parameter</b>                              |           |                |                        |                               |                        |        |                        |
|                                               |           | n              | Prevalence per 100,000 | n                             | Prevalence per 100,000 | N      | Prevalence per 100,000 |
| High-risk pregnancies pregnancy conditions    | 12-20     | 391            | 64,950                 | 52                            | 59,091                 | 443    | 64,203                 |
|                                               | 21-30     | 5,034          | 67,871                 | 190                           | 60,510                 | 5,224  | 67,572                 |
|                                               | 31-40     | 7,341          | 70,182                 | 91                            | 59,091                 | 7,432  | 70,021                 |
|                                               | 41-50     | 594            | 72,794                 | 11                            | 84,615                 | 605    | 72,979                 |
|                                               | all       | 13,360         | 69,241                 | 344                           | 60,457                 | 13,704 | 68,989                 |
| Abortive outcomes and stillbirths             | 12-20     | 31             | 5,150                  | 5                             | 5,682                  | 36     | 5,217                  |
|                                               | 21-30     | 326            | 4,395                  | 20                            | 6,369                  | 346    | 4,475                  |
|                                               | 31-40     | 472            | 4,512                  | 19                            | 12,338                 | 491    | 4,626                  |
|                                               | 41-50     | 90             | 11,029                 | 0                             | 0                      | 90     | 10,856                 |
|                                               | all       | 919            | 4,763                  | 44                            | 7,733                  | 963    | 4,848                  |
| Perinatal complications                       | 12-20     | 329            | 54,651                 | 49                            | 55,682                 | 378    | 54,783                 |
|                                               | 21-30     | 4,519          | 60,928                 | 163                           | 51,911                 | 4,682  | 60,561                 |
|                                               | 31-40     | 6,343          | 60,641                 | 74                            | 48,052                 | 6,417  | 60,458                 |
|                                               | 41-50     | 397            | 48,652                 | 3                             | 23,077                 | 400    | 48,251                 |
|                                               | all       | 11,588         | 60,057                 | 289                           | 50,791                 | 11,877 | 59,792                 |
| Caesarean sections                            | 12-20     | 104            | 17,276                 | 9                             | 10,227                 | 113    | 16,377                 |
|                                               | 21-30     | 1,693          | 22,826                 | 58                            | 18,471                 | 1,751  | 22,649                 |
|                                               | 31-40     | 2,998          | 28,662                 | 33                            | 21,429                 | 3,031  | 28,557                 |
|                                               | 41-50     | 310            | 37,990                 | 6                             | 46,154                 | 316    | 38,118                 |
|                                               | all       | 5,105          | 26,458                 | 106                           | 18,629                 | 5,211  | 26,233                 |
| Postnatal complications in post-partum period | 12-20     | 3              | 498                    | 2                             | 2,273                  | 5      | 725                    |
|                                               | 21-30     | 79             | 1,065                  | 6                             | 1,911                  | 85     | 1,099                  |
|                                               | 31-40     | 97             | 927                    | 3                             | 1,948                  | 100    | 942                    |
|                                               | 41-50     | 14             | 1,716                  | 1                             | 7,692                  | 15     | 1,809                  |
|                                               | all       | 193            | 1,000                  | 12                            | 2,109                  | 205    | 1,032                  |
| Perinatal complications of the newborn        | 12-20     | 0              | 0                      | 0                             | 0                      | 0      | 0                      |
|                                               | 21-30     | 2              | 27                     | 0                             | 0                      | 2      | 26                     |
|                                               | 31-40     | 2              | 19                     | 0                             | 0                      | 2      | 19                     |
|                                               | 41-50     | 1              | 123                    | 0                             | 0                      | 1      | 121                    |
|                                               | all       | 5              | 26                     | 0                             | 0                      | 5      | 25                     |
