# Supplementary material for: Differences in pregnancy outcomes and obstetric care between asylum seeking and resident women: a cross-sectional study in a German federal state, 2010–2016
Source: Springer Nature journal article supplement (doi:10.1186/s12884-018-2053-1), 2018-10-24
Supplement: MOESM2 [file 16222712]

**Additional file 2: Regression coefficients and odds ratios with 95 % confidence intervals for multivariate logistic regression models**

| Modelnr. | Outcome                                         | Independent Variables | $\beta$ | 2.5%  | 97.5% | Odds Ratio | 2.5% | 97.5%   | p-value |
|----------|-------------------------------------------------|-----------------------|---------|-------|-------|------------|------|---------|---------|
| 1        | High-High-risk pregnancies pregnancy conditions | Asylum seeker         | -0.28   | -0.46 | -0.10 | 0.76       | 0.63 | 0.91    | 0.00    |
|          |                                                 | Age (years)           | 0.01    | 0.00  | 0.01  | 1.01       | 1.00 | 1.01    | 0.01    |
|          |                                                 | log(dur)              | 0.87    | 0.82  | 0.93  | 2.40       | 2.27 | 2.53    | 0.00    |
| 2        | Abortive outcomes/stillbirths                   | Asylum seeker         | 0.49    | 0.14  | 0.81  | 1.63       | 1.15 | 2.26    | 0.00    |
|          |                                                 | Age (years)           | 0.05    | 0.03  | 0.06  | 1.05       | 1.04 | 1.06    | 0.00    |
|          |                                                 | log(dur)              | -1.56   | -1.67 | -1.46 | 0.21       | 0.19 | 0.23    | 0.00    |
| 3        | Perinatal complications                         | Asylum seeker         | -0.38   | -0.56 | -0.21 | 0.68       | 0.57 | 0.81    | 0.00    |
|          |                                                 | Age (years)           | -0.02   | -0.02 | -0.01 | 0.98       | 0.98 | 0.99    | 0.00    |
|          |                                                 | log(dur)              | 0.86    | 0.81  | 0.91  | 2.37       | 2.25 | 2.49    | 0.00    |
| 4        | Caesarean Sections                              | Asylum seeker         | -0.25   | -0.48 | -0.01 | 0.78       | 0.62 | 0.99    | 0.04    |
|          |                                                 | Age (years)           | 0.04    | 0.03  | 0.05  | 1.04       | 1.03 | 1.05    | 0.00    |
|          |                                                 | log(dur)              | 1.77    | 1.69  | 1.84  | 5.85       | 5.44 | 6.30    | 0.00    |
| 5        | Postnatal complications                         | Asylum seeker         | 0.79    | 0.14  | 1.35  | 2.21       | 1.15 | 3.85    | 0.01    |
|          |                                                 | Age (years)           | 0.01    | -0.02 | 0.03  | 1.01       | 0.98 | 1.03    | 0.64    |
|          |                                                 | log(dur)              | 0.08    | -0.13 | 0.29  | 1.09       | 0.88 | 1.34    | 0.44    |
| 6        | Perinatal neonatal complication                 | Asylum seeker         | -13.84  |       | 99.81 | 0.00       |      | 9.9e-01 | 0.99    |
|          |                                                 | Age (years)           | 0.12    | -0.04 | 0.30  | 1.13       | 0.96 | 1.35    | 0.15    |
|          |                                                 | log(dur)              | -0.31   | -1.64 | 0.99  | 0.74       | 0.19 | 2.69    | 0.66    |
| 7        | Abortive outcomes/stillbirths                   | Asylum seeker         | 0.46    | 0.11  | 0.79  | 1.58       | 1.11 | 2.20    | 0.01    |
|          |                                                 | Age (years)           | 0.05    | 0.04  | 0.06  | 1.05       | 1.04 | 1.06    | 0.00    |
|          |                                                 | log(dur)              | -1.47   | -1.58 | -1.36 | 0.23       | 0.21 | 0.26    | 0.00    |
|          |                                                 | HIGH-RISK PREGNANCIES | -1.17   | -1.31 | -1.03 | 0.31       | 0.27 | 0.36    | 0.00    |
| 8        | Perinatal complicatons                          | Asylum seeker         | -0.43   | -0.61 | -0.25 | 0.65       | 0.55 | 0.78    | 0.00    |
|          |                                                 | Age (years)           | -0.02   | -0.02 | -0.01 | 0.98       | 0.98 | 0.99    | 0.00    |
|          |                                                 | log(dur)              | 0.98    | 0.93  | 1.03  | 2.66       | 2.52 | 2.81    | 0.00    |
|          |                                                 | HIGH-RISK PREGNANCIES | -0.60   | -0.67 | -0.53 | 0.55       | 0.51 | 0.59    | 0.00    |
| 9        | Caesarean Sections                              | Asylum seeker         | -0.17   | -0.41 | 0.07  | 0.84       | 0.66 | 1.07    | 0.17    |
|          |                                                 | Age (years)           | 0.04    | 0.03  | 0.05  | 1.04       | 1.03 | 1.05    | 0.00    |
|          |                                                 | log(dur)              | 1.57    | 1.50  | 1.64  | 4.80       | 4.46 | 5.17    | 0.00    |
|          |                                                 | HIGH-RISK PREGNANCIES | 1.13    | 1.03  | 1.22  | 3.09       | 2.81 | 3.40    | 0.00    |
| 10       | Postnatal complications                         | Asylum seeker         | 0.59    | -0.07 | 1.16  | 1.80       | 0.93 | 3.19    | 0.06    |
|          |                                                 | Age (years)           | 0.01    | -0.01 | 0.04  | 1.01       | 0.99 | 1.04    | 0.35    |
|          |                                                 | log(dur)              | 0.97    | 0.69  | 1.25  | 2.64       | 2.00 | 3.50    | 0.00    |
|          |                                                 | HIGH-RISK PREGNANCIES | -4.35   | -5.12 | -3.72 | 0.01       | 0.01 | 0.02    | 0.00    |

\*log(dur): natural logarithm of duration of admission.
